# Supplementary material for: Suenoite, □Mn2Mg5Si8O22(OH)2, a new member of the amphibole supergroup from the Scortico–Ravazzone ore deposit (Apuan Alps, Tuscany, Italy)
Source: Copernicus journal article supplement (doi:10.5194/ejm-37-761-2025), 2025-10-20
Supplement: Supplementary file [file ejm-37-761-2025-supplement-title-page.pdf › ejm-37-761-2025-supplement-title-page.pdf]

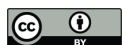

*Supplement of*

**Suenoite,  $\square\text{Mn}_2\text{Mg}_5\text{Si}_8\text{O}_{22}(\text{OH})_2$ , a new member of the amphibole supergroup from the Scortico–Ravazzone ore deposit (Apuan Alps, Tuscany, Italy)**

**Cristian Biagioni et al.**

*Correspondence to:* Cristian Biagioni ([cristian.biagioni@unipi.it](mailto:cristian.biagioni@unipi.it))

- [ejm-37-761-2025-supplement-title-page.pdf](#)
- [suenoite\\_rev1.cif](#)

The copyright of individual parts of the supplement might differ from the article licence.
